# Supplementary material for: Characterisation and source identification of biofluorescent aerosol emissions over winter and summer periods in the United Kingdom
Source: Copernicus journal article supplement (doi:10.5194/acp-19-1665-2019), 2019-02-08
Supplement: Supplementary file 1 [file acp-19-1665-2019-supplement.pdf]

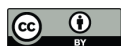

*Supplement of*

## **Characterisation and source identification of biofluorescent aerosol emissions over winter and summer periods in the United Kingdom**

**Elizabeth Forde et al.**

*Correspondence to:* Elizabeth Forde ([elizabeth.forde@manchester.ac.uk](mailto:elizabeth.forde@manchester.ac.uk))

The copyright of individual parts of the supplement might differ from the CC BY 4.0 License.

## 1 Chilbolton Temperature boxplot

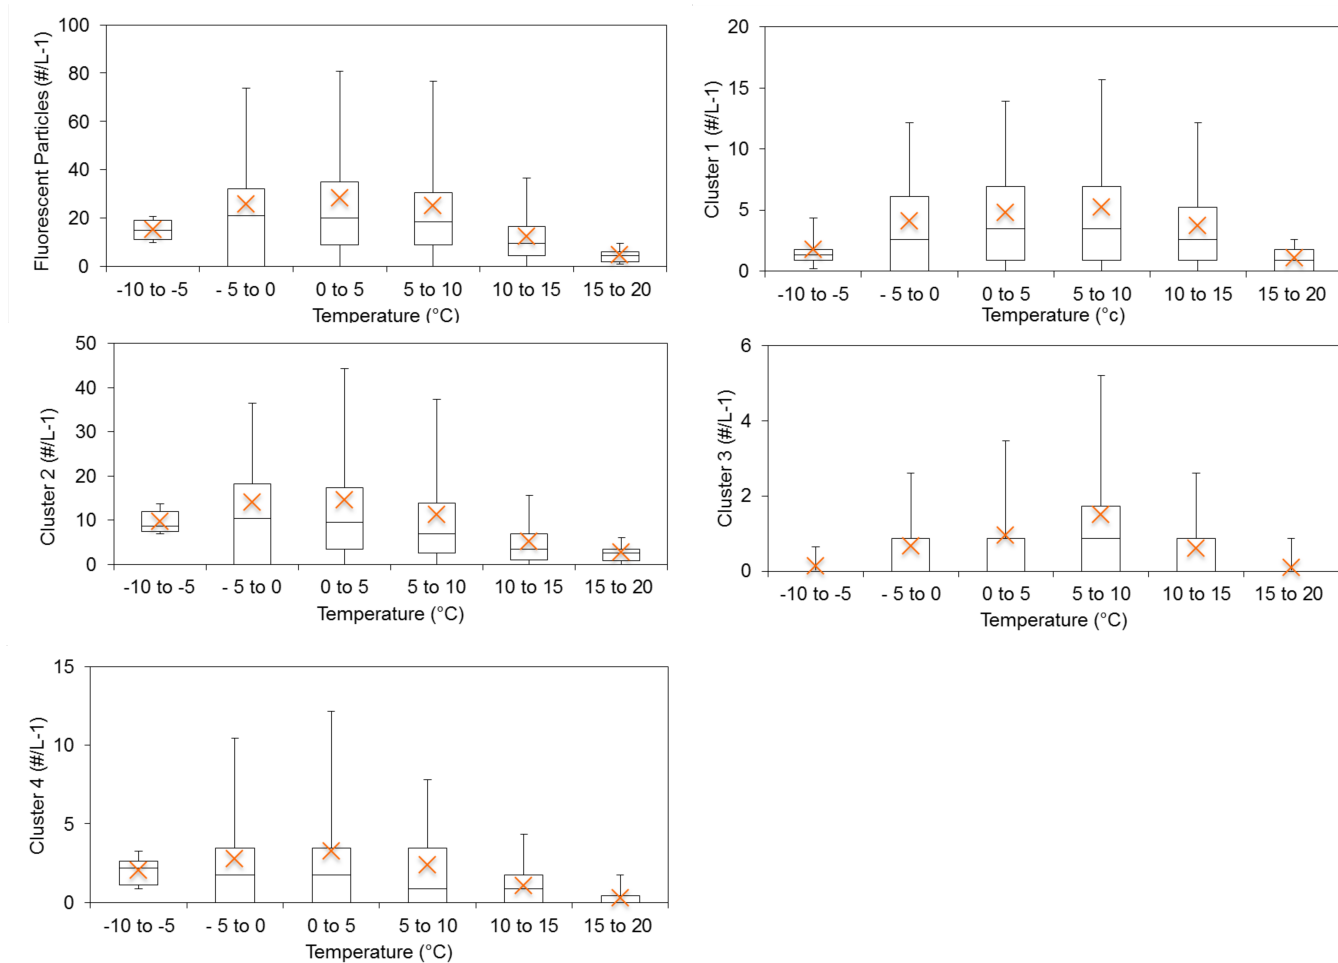

Figure S1: Chilbolton temperature plots in relation to total fluorescent particles and clusters.

## 2 Chilbolton Relative Humidity boxplot

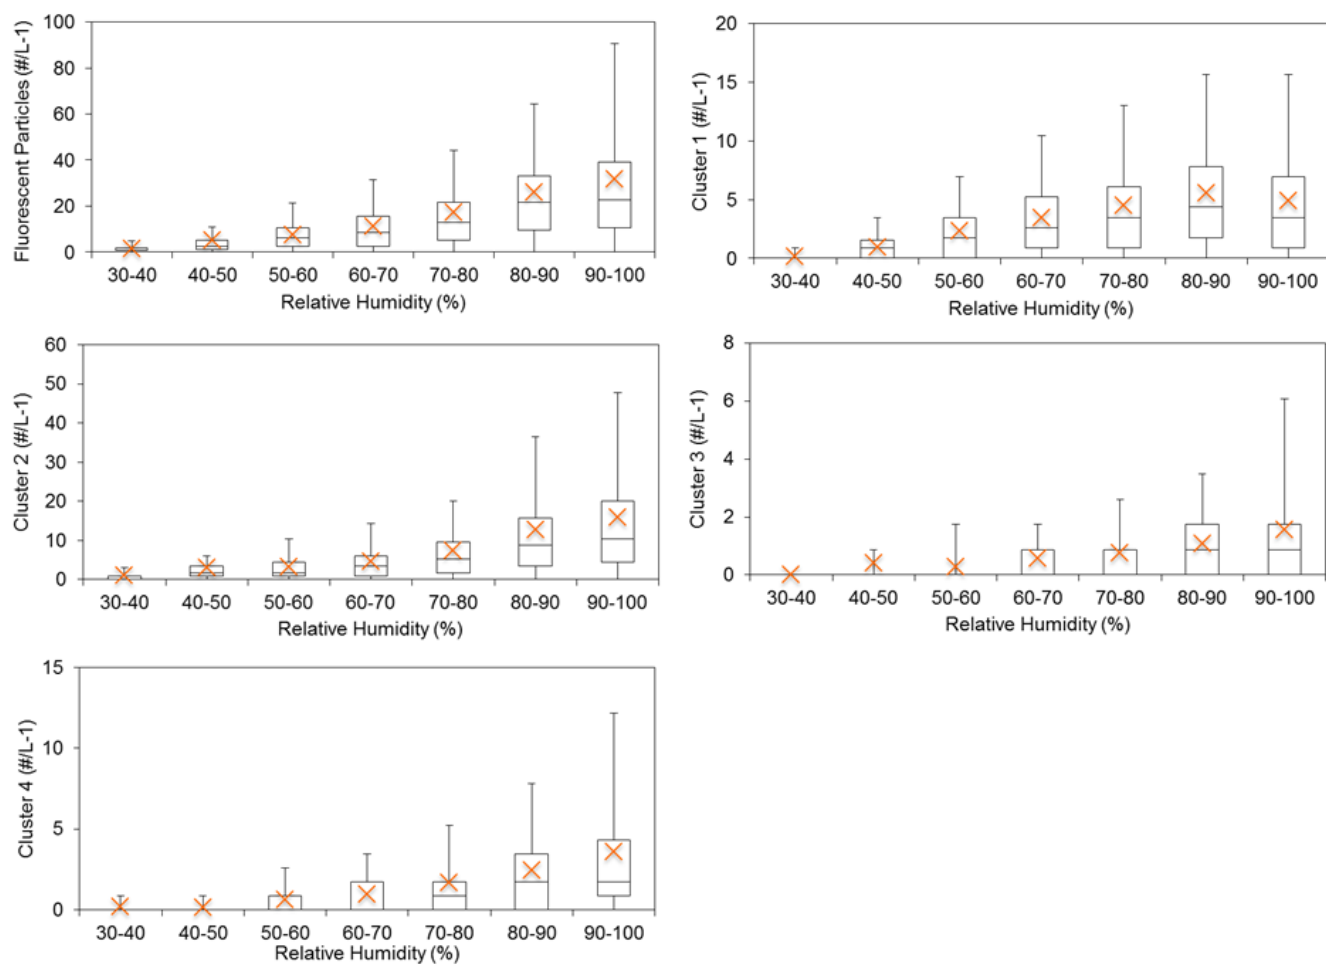

Figure S2: Chilbolton relative humidity plots in relation to total fluorescent particles and clusters.

### 3 Weybourne Temperature boxplot

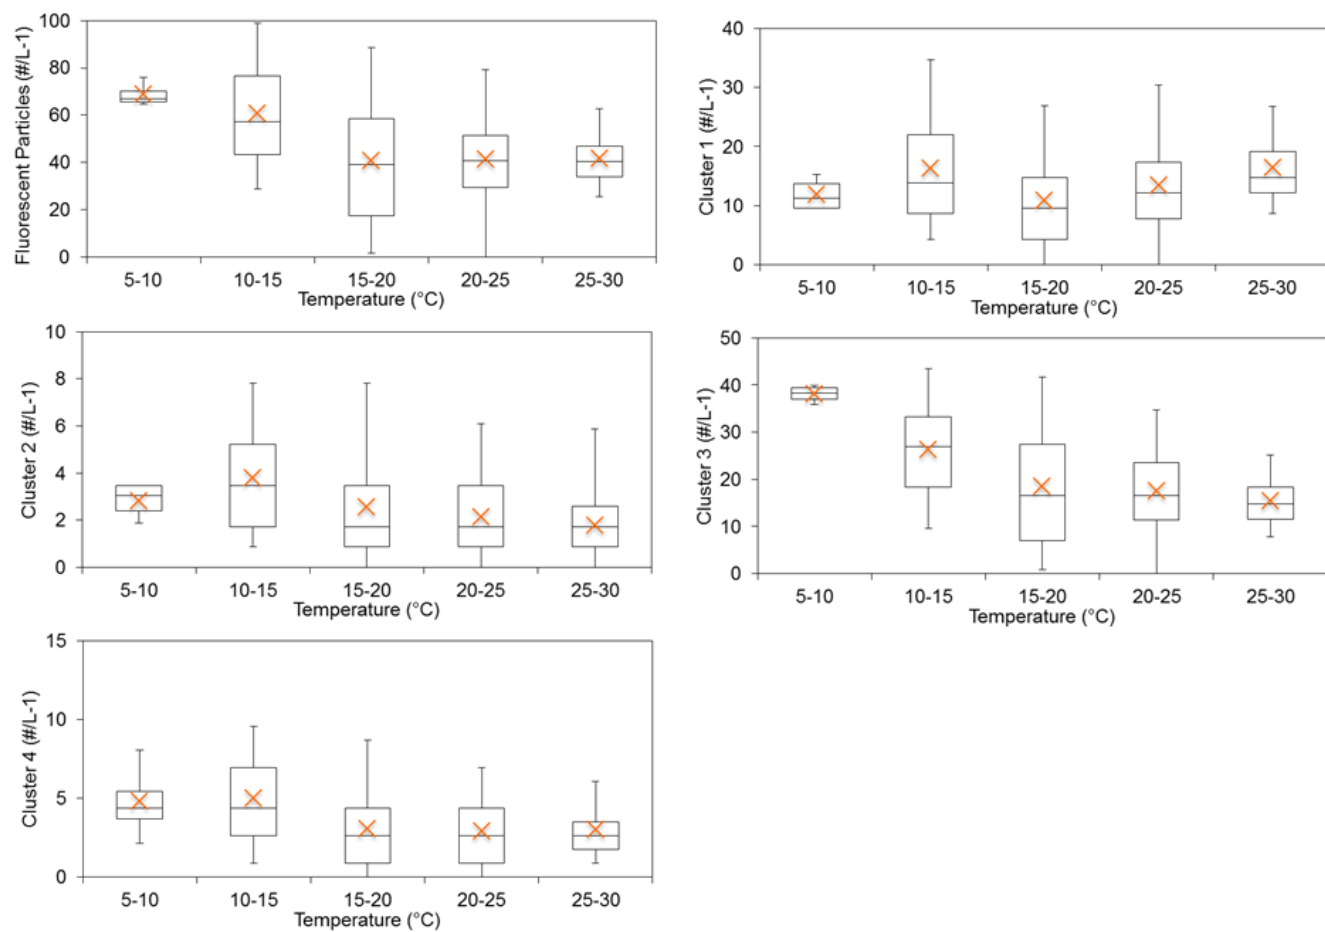

Figure S3: Weybourne temperature plots in relation to total fluorescent particles and clusters.



## 4 Weybourne Relative Humidity boxplot

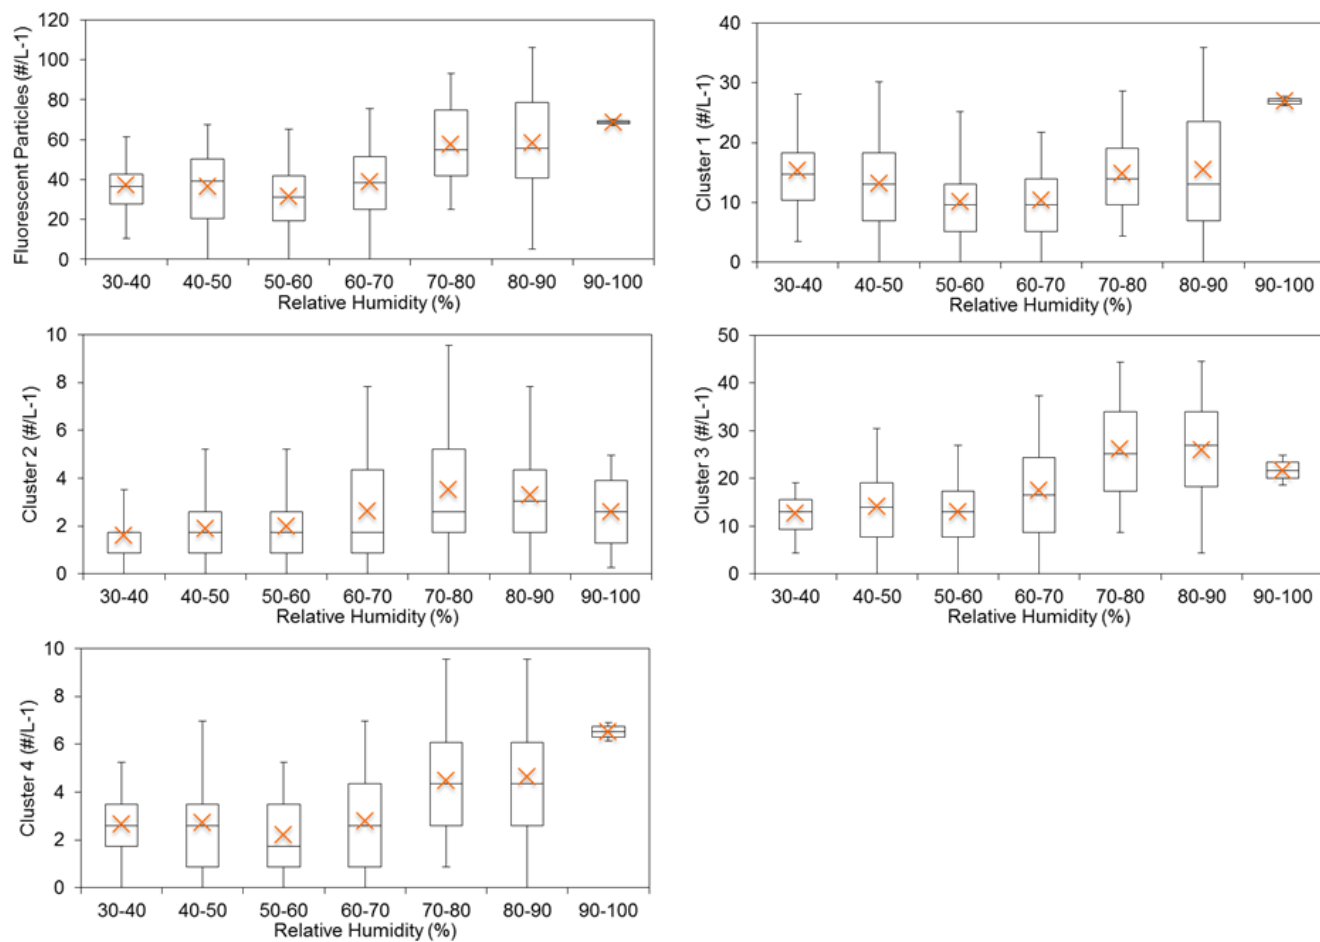

Figure S4: Weybourne relative humidity plots in relation to total fluorescent particles and clusters.

## 5 Davidstow Temperature boxplot

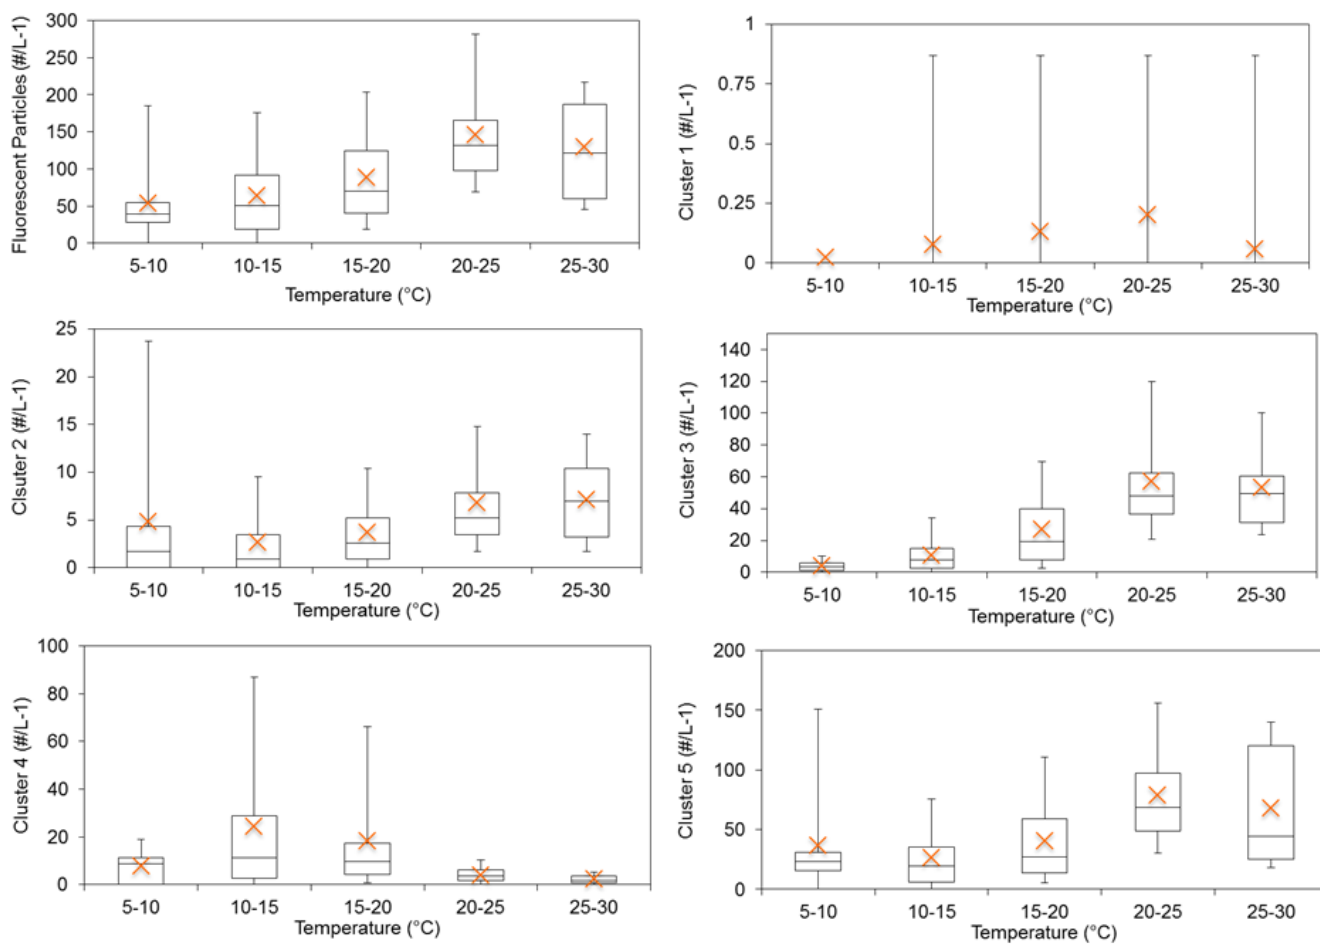

Figure S5: Davidstow temperature plots in relation to total fluorescent particles and clusters.

## 6 Davidstow Relative Humidity boxplot

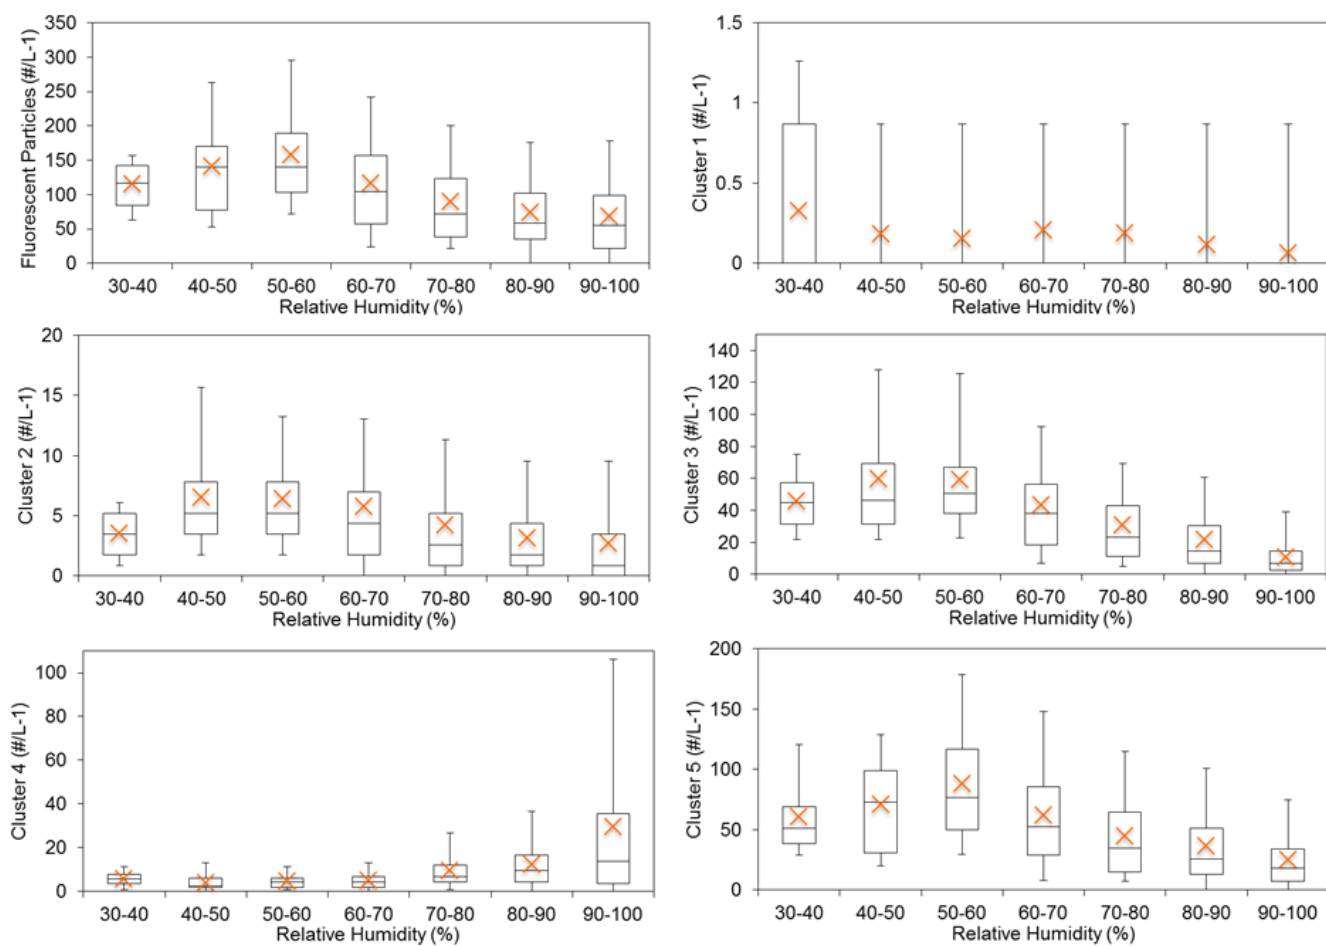

Figure S6: Davidstow relative humidity plots in relation to total fluorescent particles and clusters.

## 7 Capel Dewi Temperature boxplot

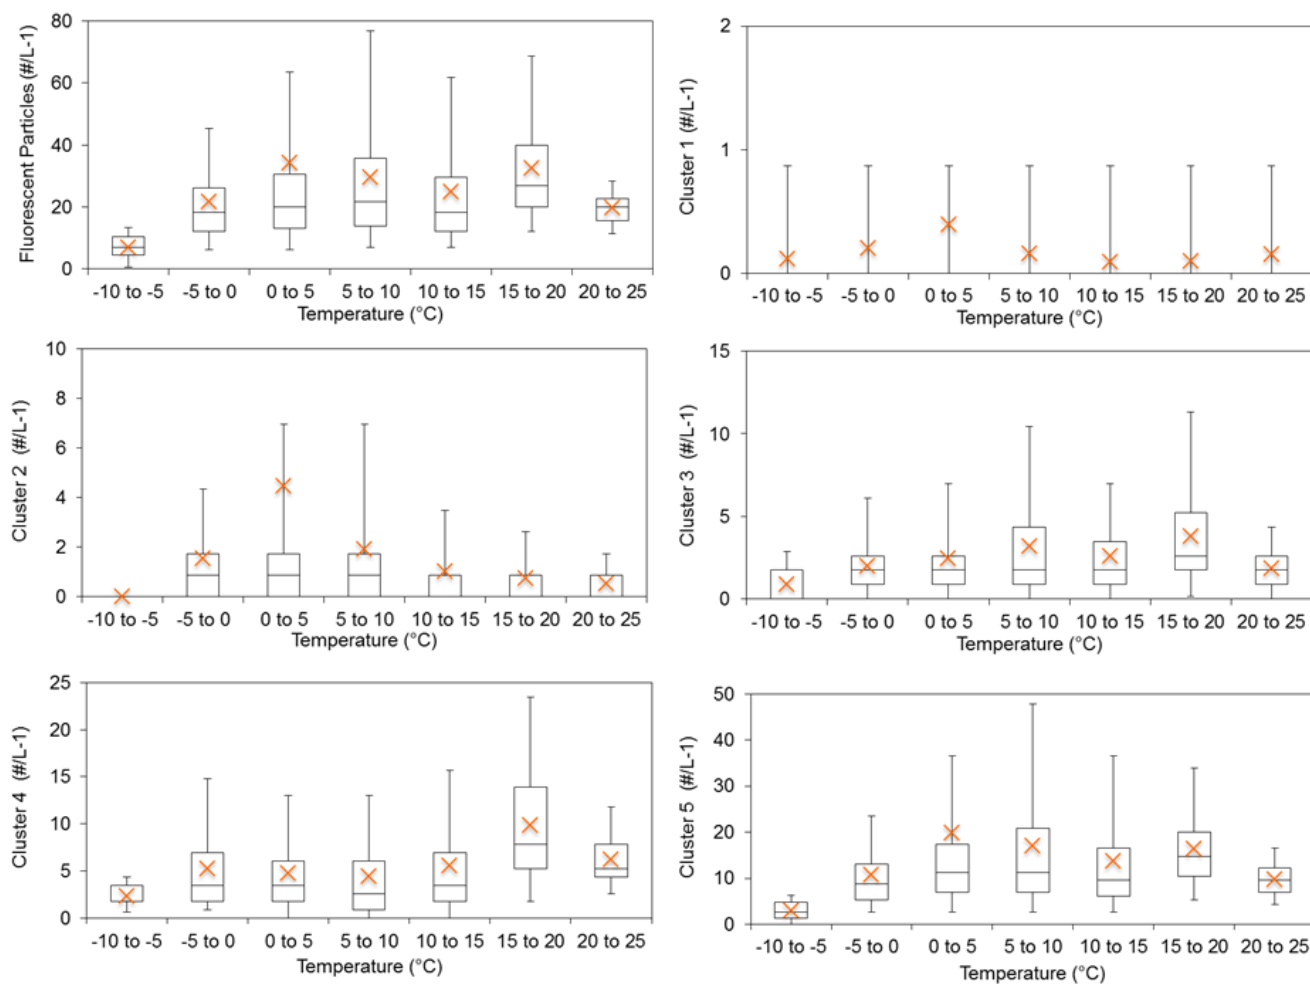

Figure S7: Capel Dewi temperature plots in relation to total fluorescent particles and clusters.

## 8 Capel Dewi Relative Humidity boxplot

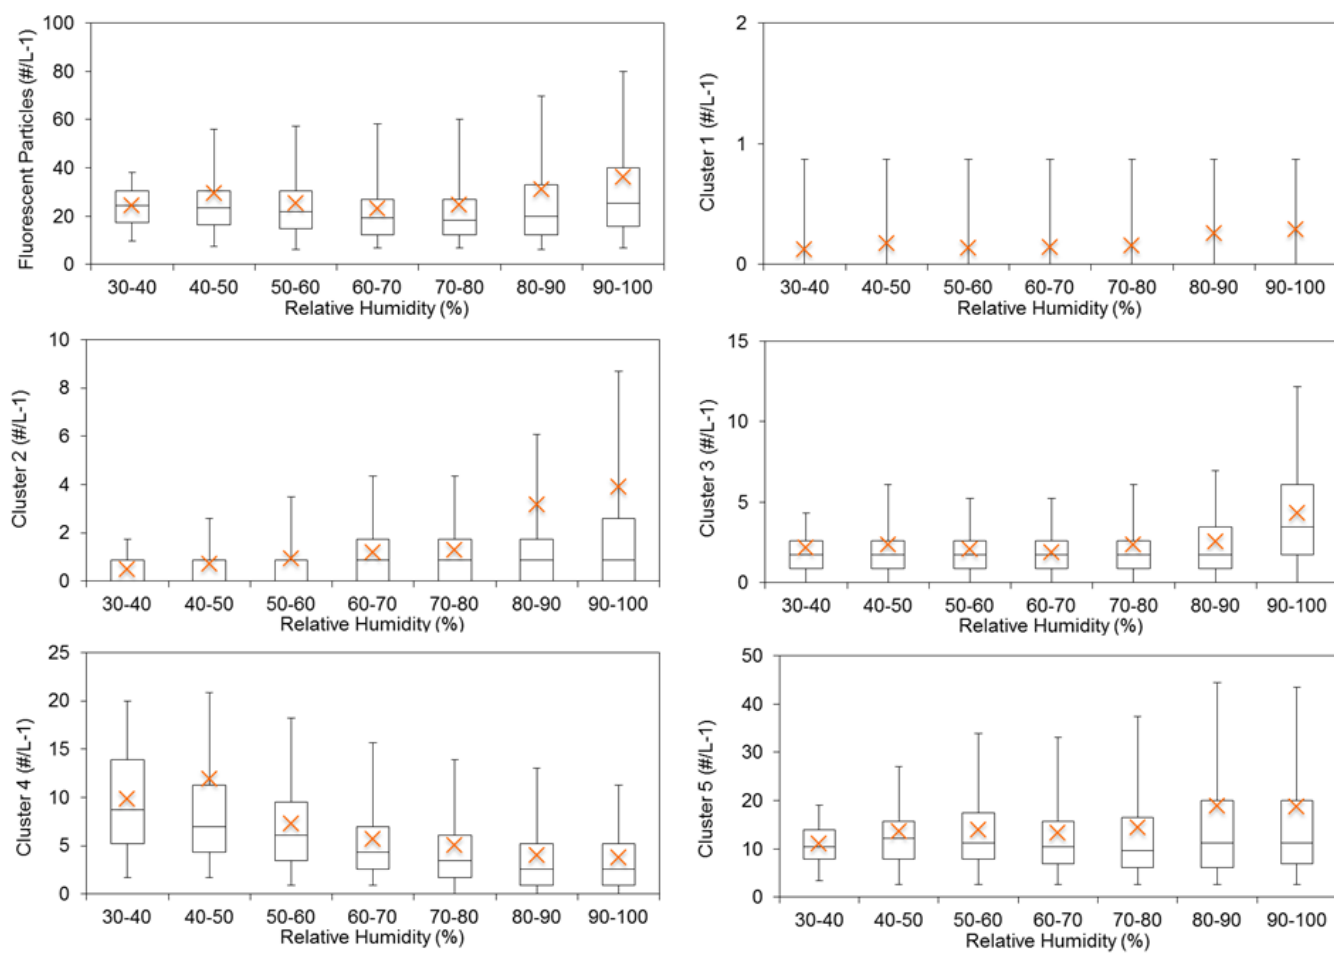

Figure S8: Capel Dewi relative humidity plots in relation to total fluorescent particles and clusters.

## 9 Openair - Chilbolton

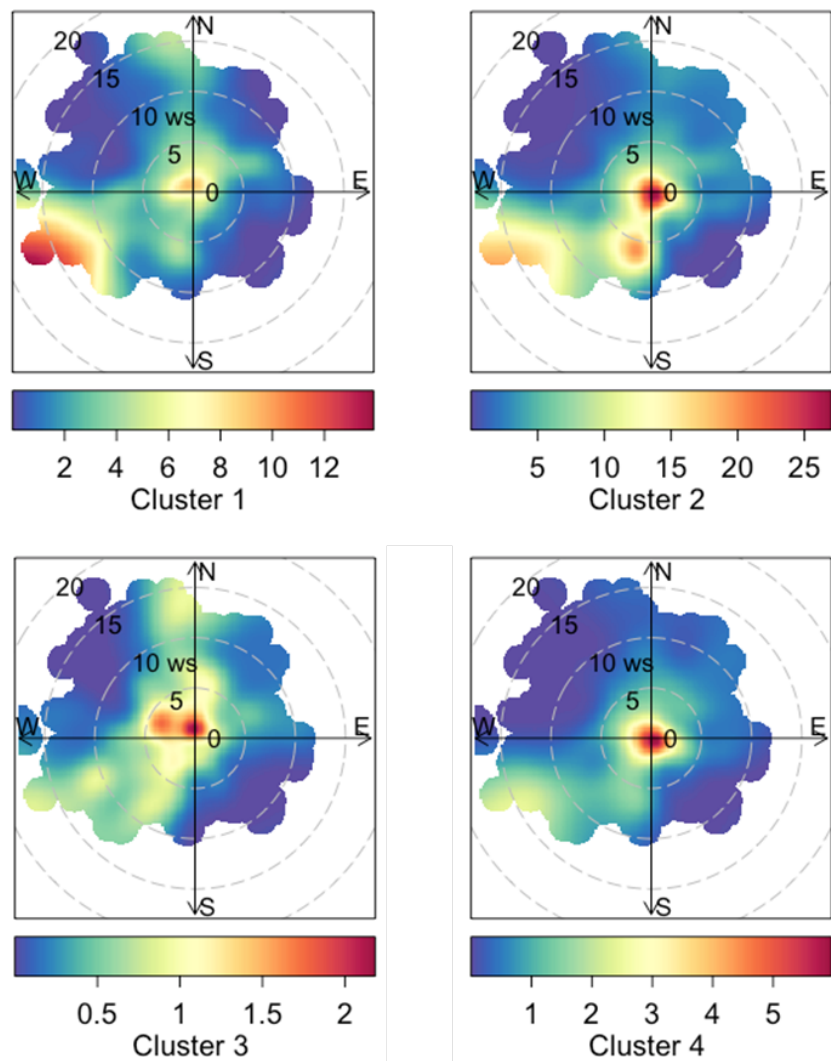

Figure S9: Chilbolton Openair PolarPlots.

## 10 Openair - Weybourne

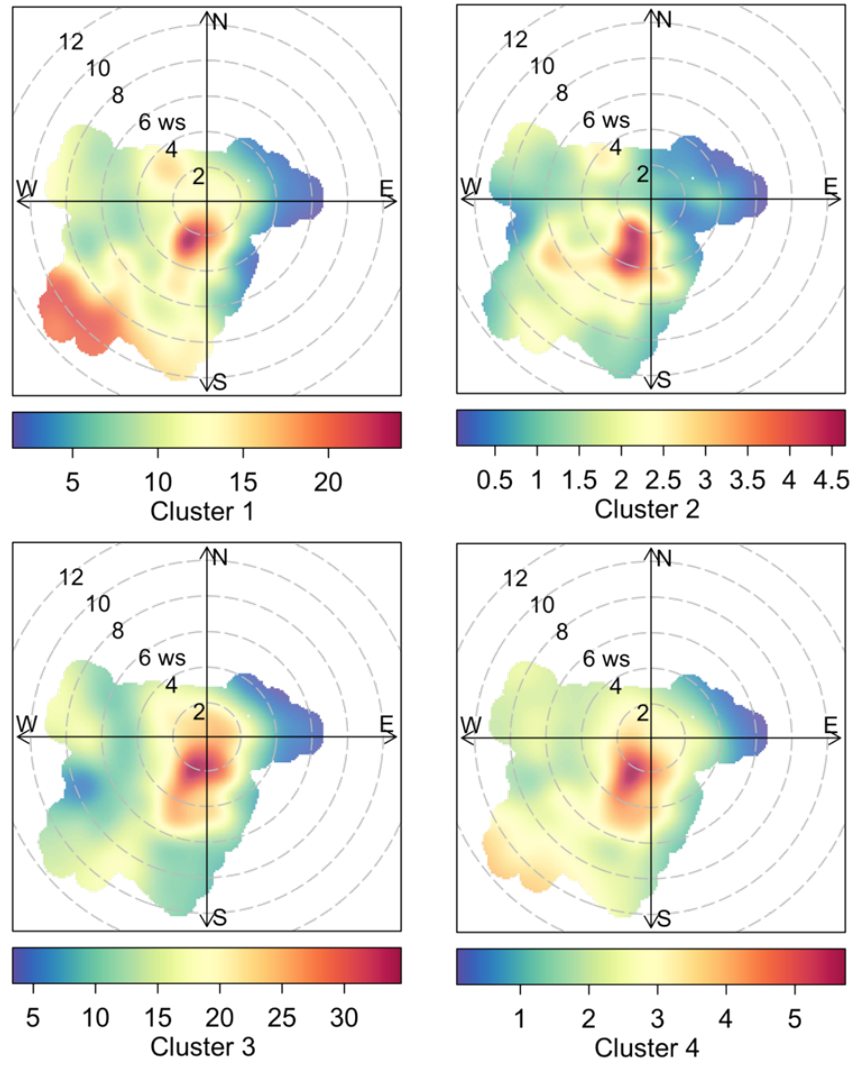

Figure S10: Weybourne Openair PolarPlots.

## 11 Openair - Davidstow

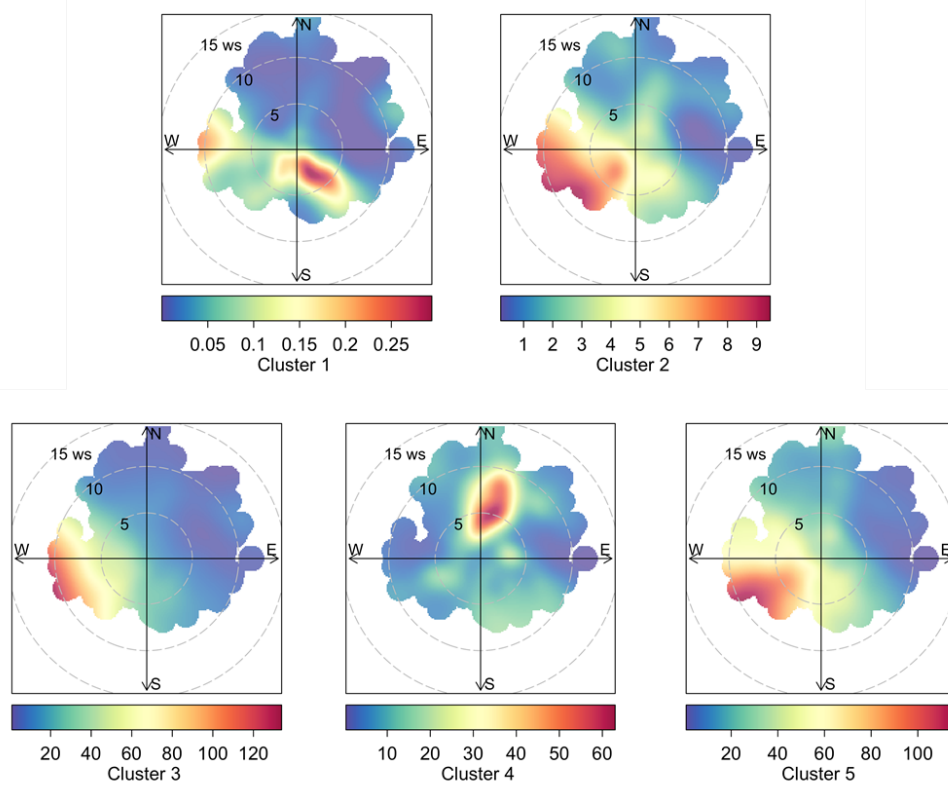

Figure S11: Davidstow Openair PolarPlots.



## 12 Openair - Capel Dewi

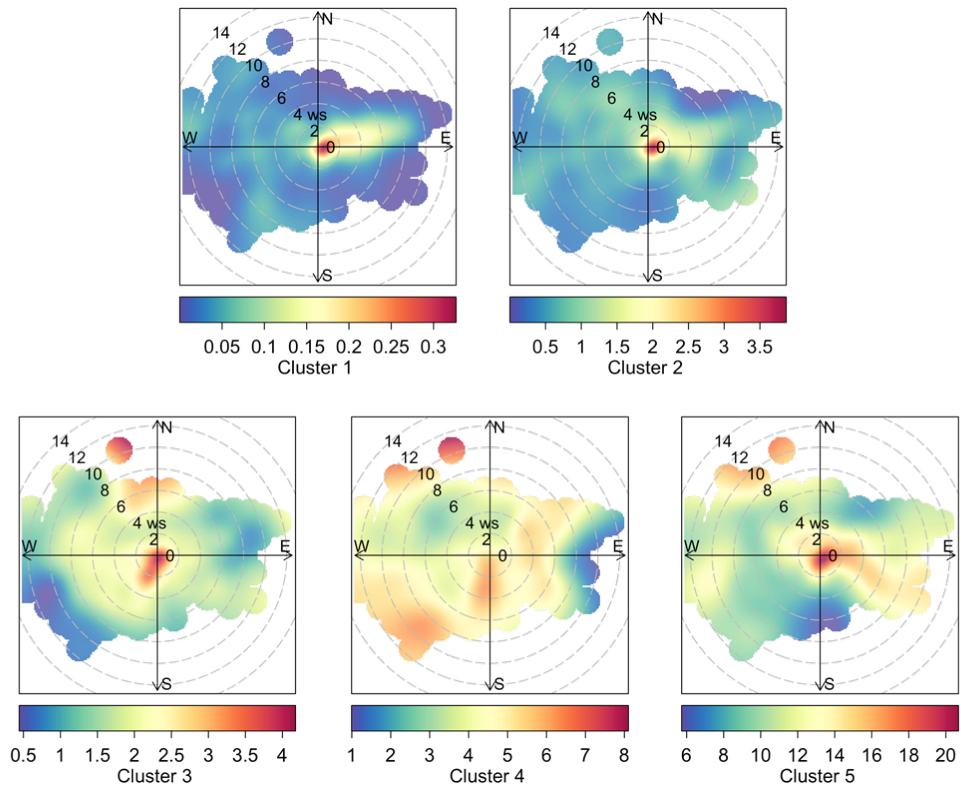

Figure S12: Capel Dewi Openair PolarPlots.

## 13 FT + 3SD/9SD - Chilbolton

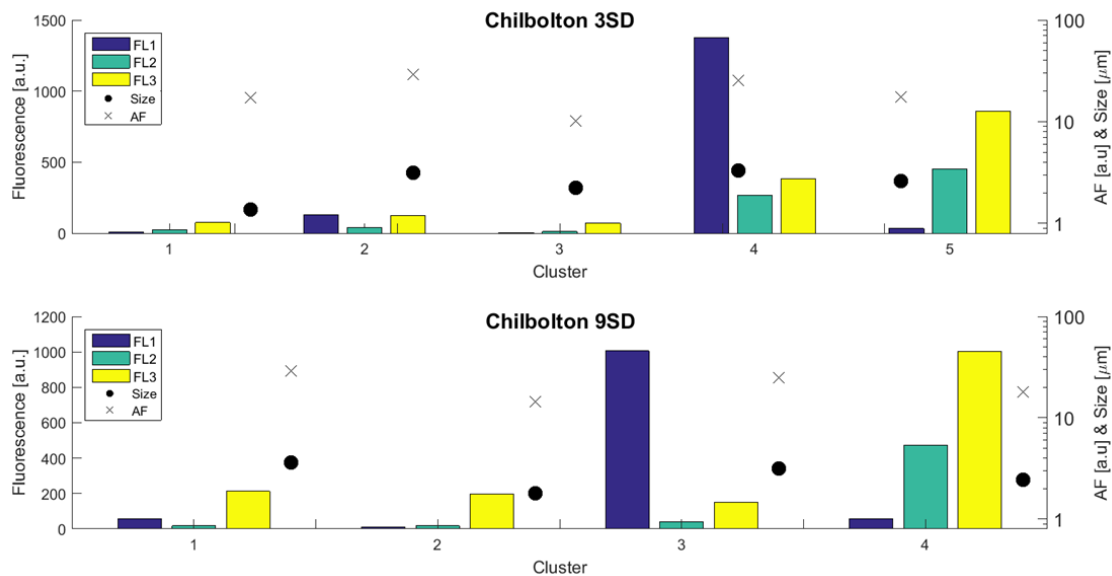

Figure S13: Chilbolton 3SD and 9SD cluster solutions.

## 14 FT + 3SD/9SD - Weybourne

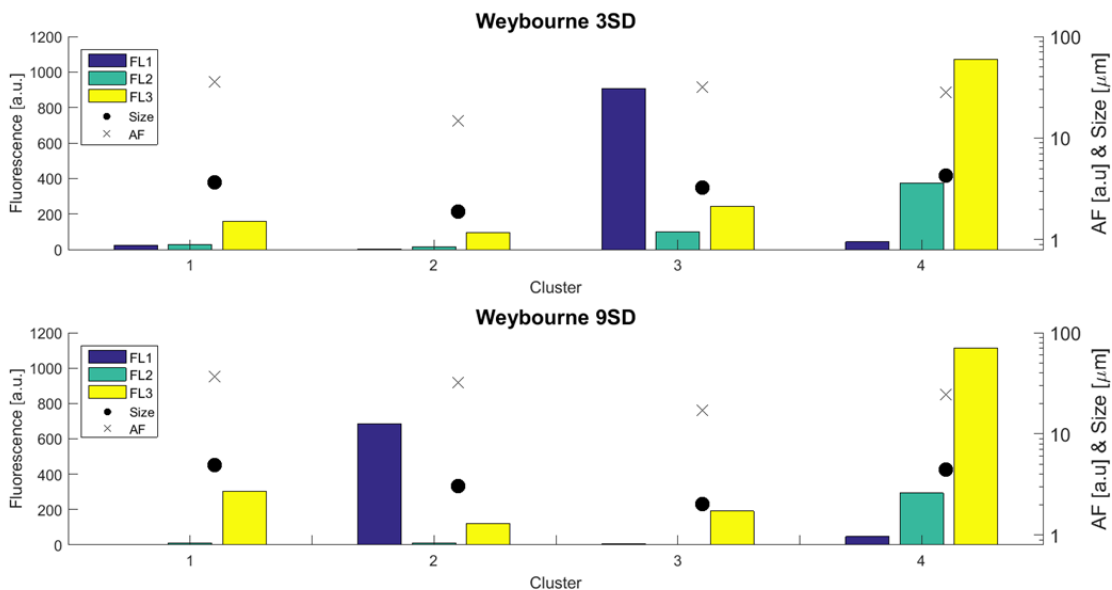

Figure S14: Weybourne 3SD and 9SD cluster solutions.

## 15 FT + 3SD/9SD - Davidstow

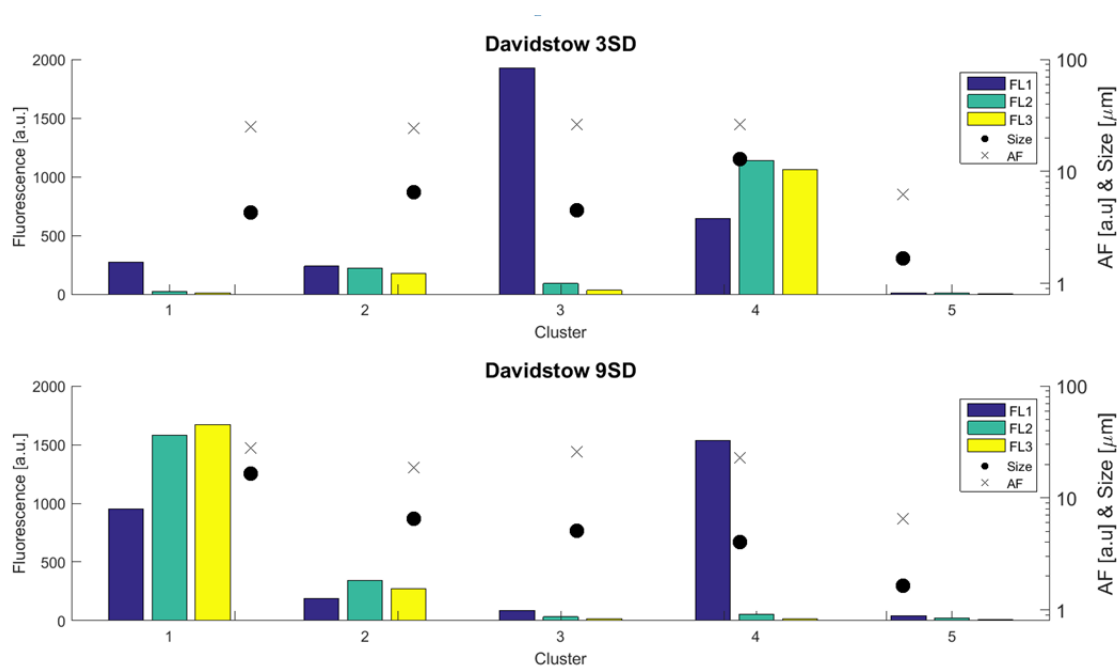

Figure S15: Davidstow 3SD and 9SD cluster solutions.

## 16 FT + 3SD/9SD - Capel Dewi

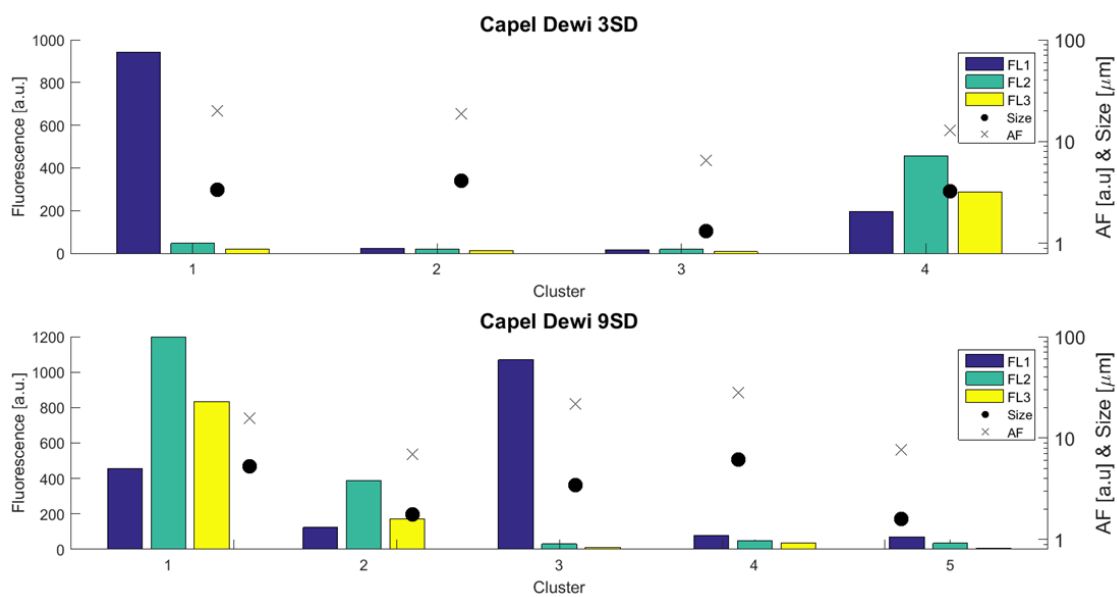

Figure S16: Capel Dewi 3SD and 9SD cluster solutions.
